# Supplementary material for: Strain-driven growth of ultra-long two-dimensional nano-channels
Source: PubMed Central journal article supplement (PMC7005715; doi:10.1038/s41467-020-14521-8), 2020-02-07
Supplement: 41467_2020_14521_MOESM3_ESM.pdf [file 41467_2020_14521_MOESM3_ESM.pdf]

## Description of Additional Supplementary Files

File Name: Supplementary Movie 1

Description: Phase field simulation of the growth of 6-point star MoSe<sub>2</sub>.
